# Supplementary material for: Association between systemic lupus erythematosus and disruption of gut microbiota: a meta-analysis
Source: PubMed Central journal article supplement — Lupus Sci Med. 2022 Mar 28;9(1):e000599. doi: 10.1136/lupus-2021-000599 (PMC8961174; doi:10.1136/lupus-2021-000599), 2022-03-28

## Supplementary Information 2

**Figure S1. Funnel chart of the comparison of the gut microbiota diversity and the relative abundance of some flora between patients with SLE and HCs. (A) Shannon-wiener diversity index, (B) Chao1 richness estimator, (C) *Ruminococcaceae*, (D) *Enterobacteriaceae*, (E) *Lachnospiraceae*, (F) *Enterococcaceae*, (G) *Bacteroides*.**

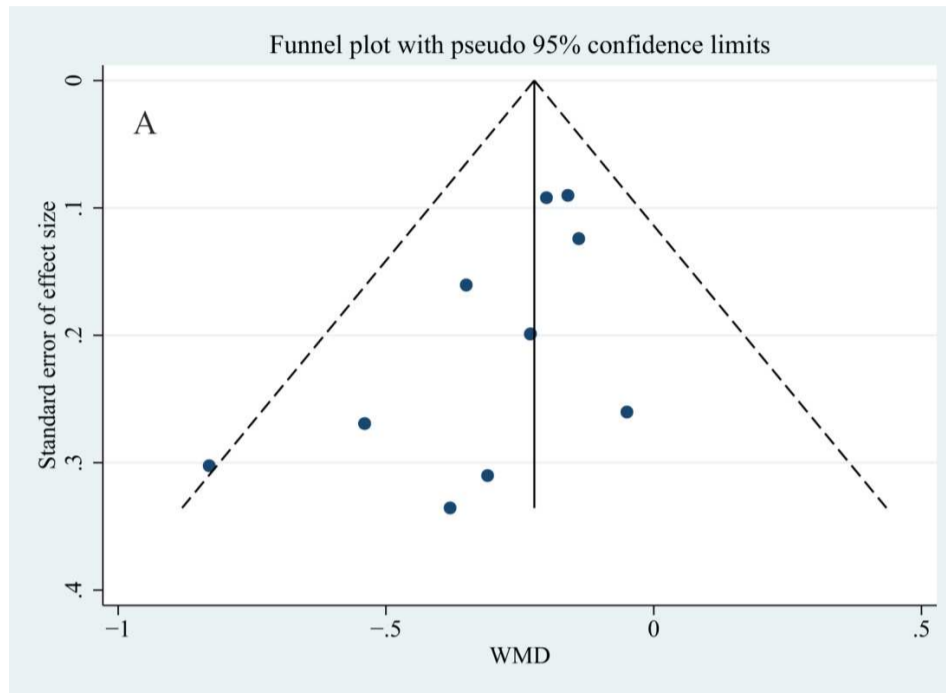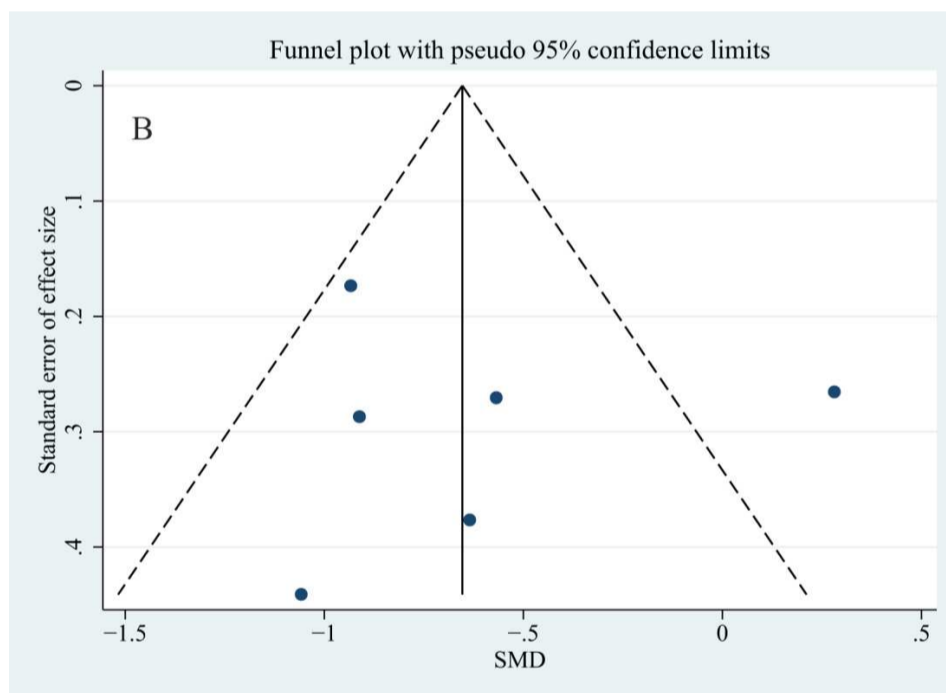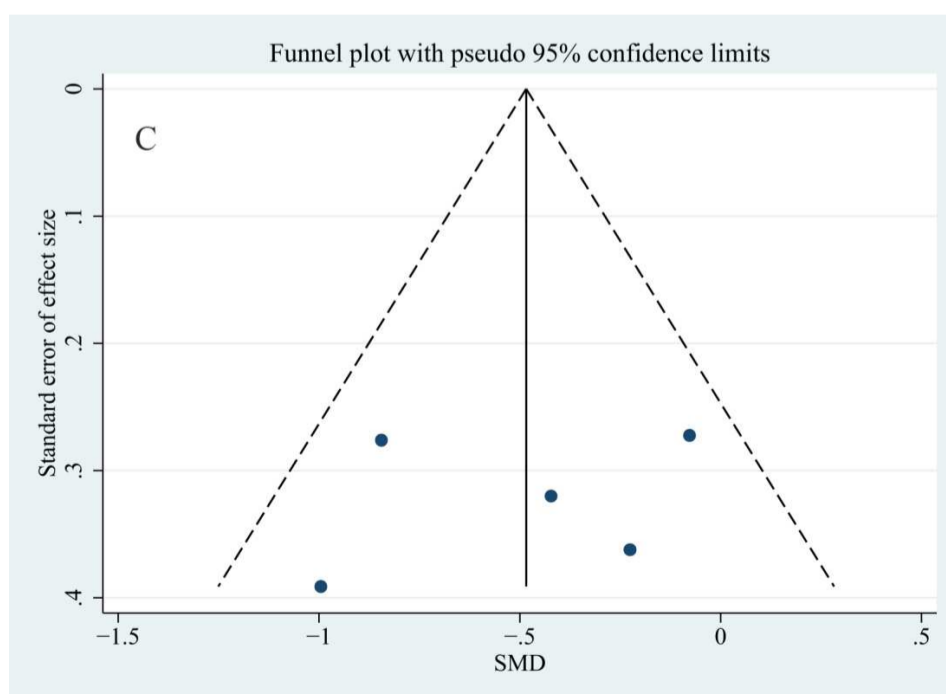

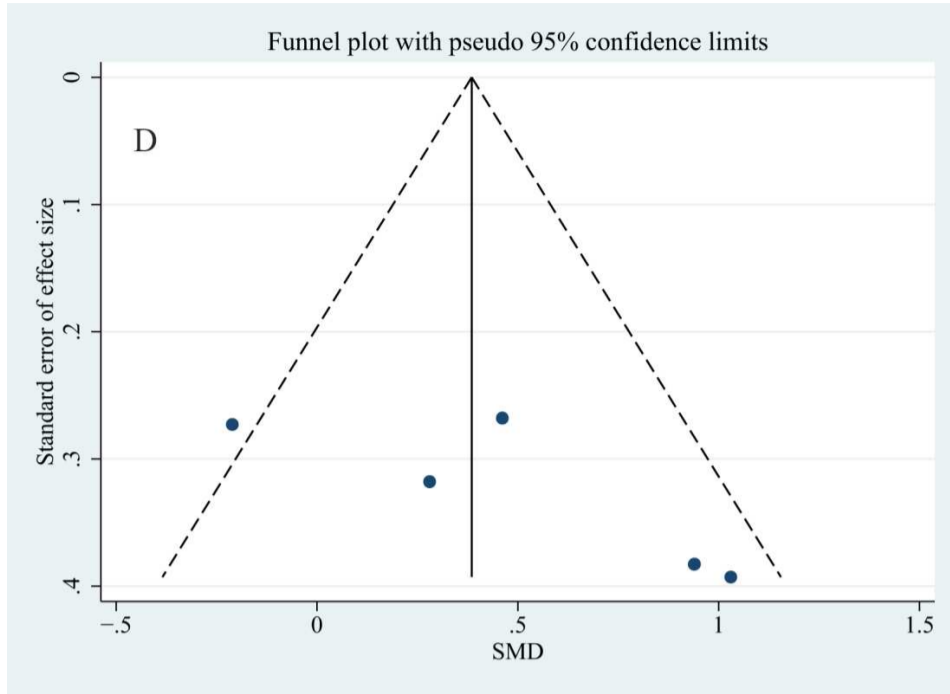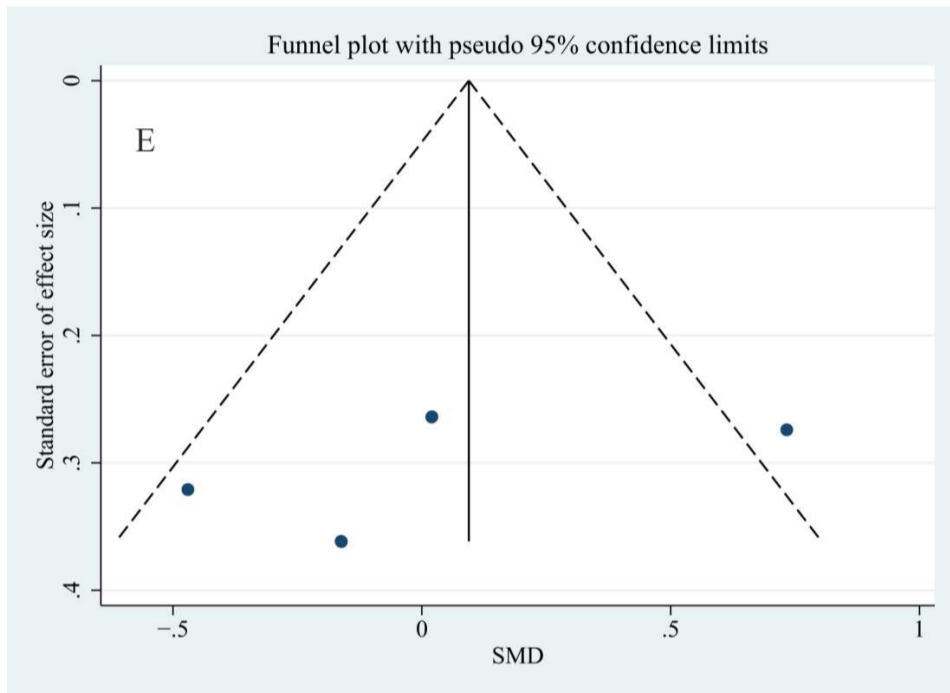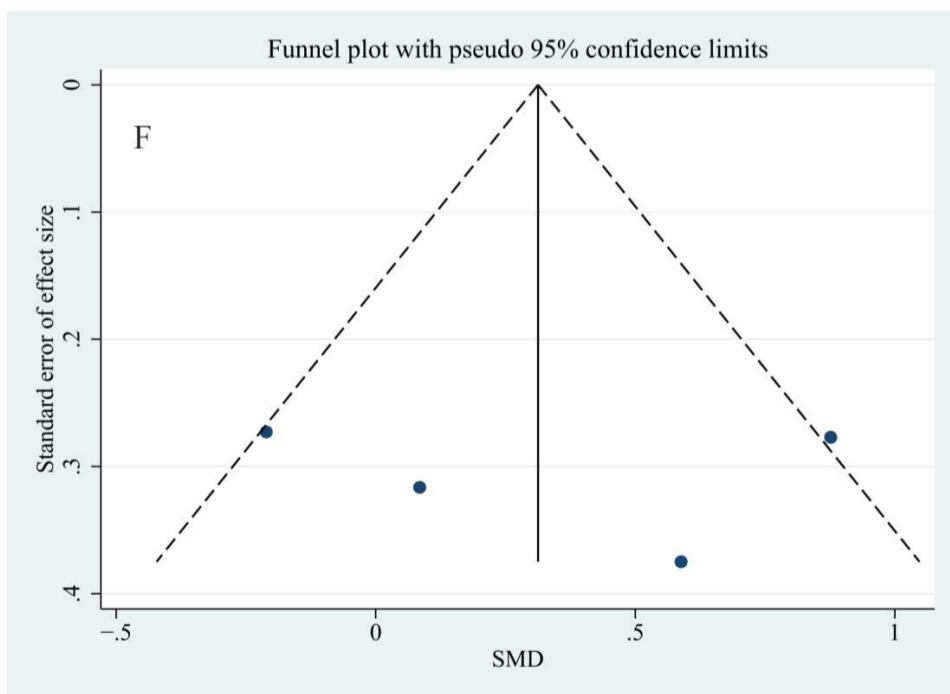

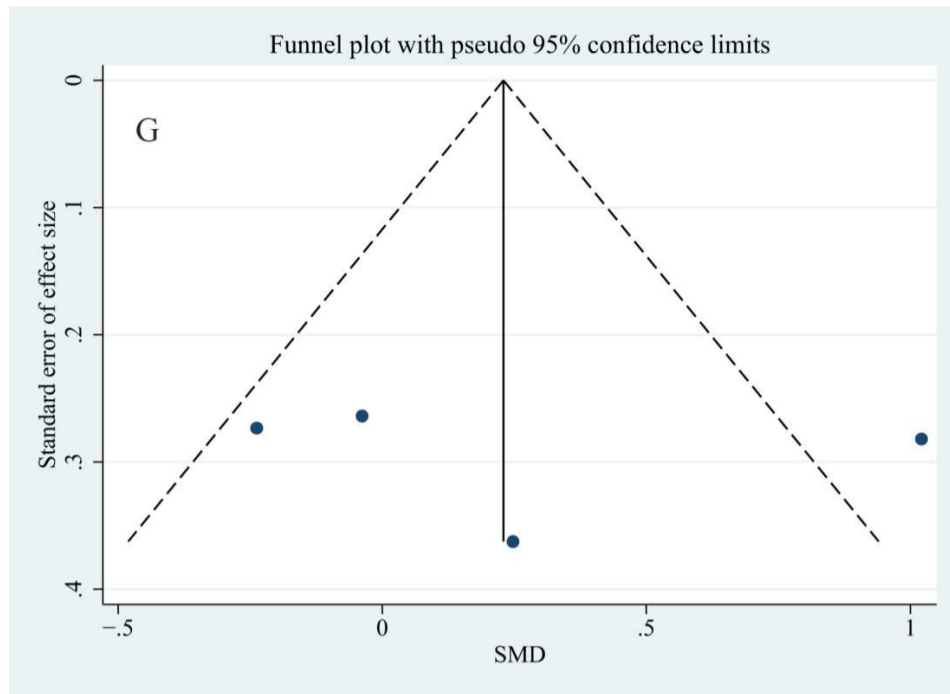

**Table S1. Egger test and Begg test identifying the publication bias for the association between the gut microbiota and SLE**

|                           | P >   t   (bias) |             |
|---------------------------|------------------|-------------|
|                           | Egger's test     | Begg's test |
| <b>Alpha diversity</b>    |                  |             |
| Shannon-wiener diversity  | 0.057            | 0.057       |
| Chao1 richness estimator  | 0.775            | 0.775       |
| <b>Gut microbiota</b>     |                  |             |
| <i>Ruminococcaceae</i>    | 0.653            | 0.653       |
| <i>Enterobacteriaceae</i> | 0.116            | 0.116       |
| <i>Lachnospiraceae</i>    | 0.434            | 0.434       |
| <i>Enterococcaceae</i>    | 0.819            | 0.819       |
| <i>Bacteroides</i>        | 0.833            | 0.833       |

**Figure S2. One-study-removed analysis on the association of the gut microbiota diversity and the relative abundance of some flora between patients with SLE and HCs. (A) Shannon-wiener diversity index, (B) Chao1 richness estimator, (C) *Ruminococcaceae*, (D) *Enterobacteriaceae*, (E) *Lachnospiraceae*, (F) *Enterococcaceae*, (G) *Bacteroides*.**

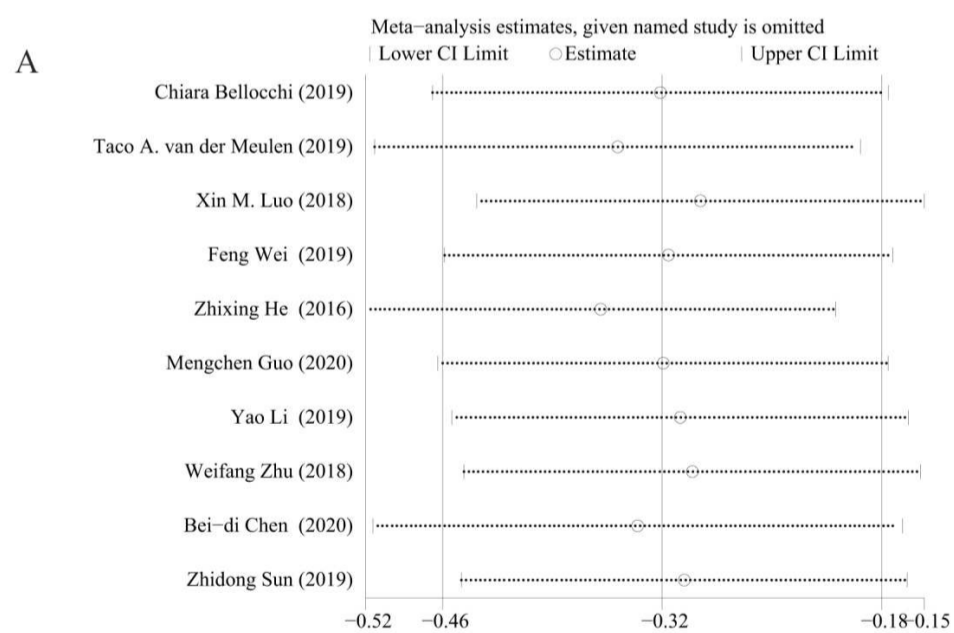

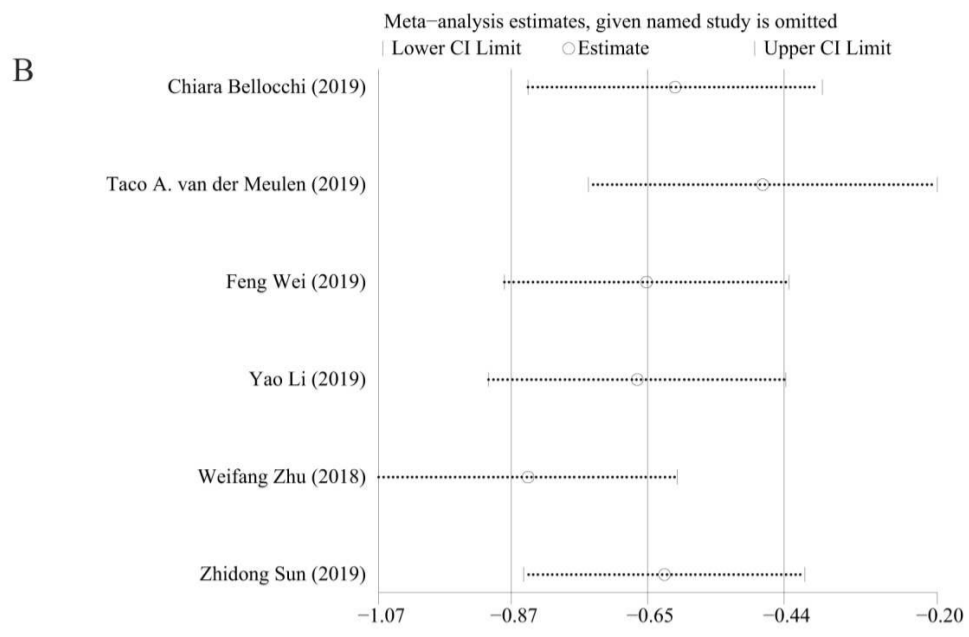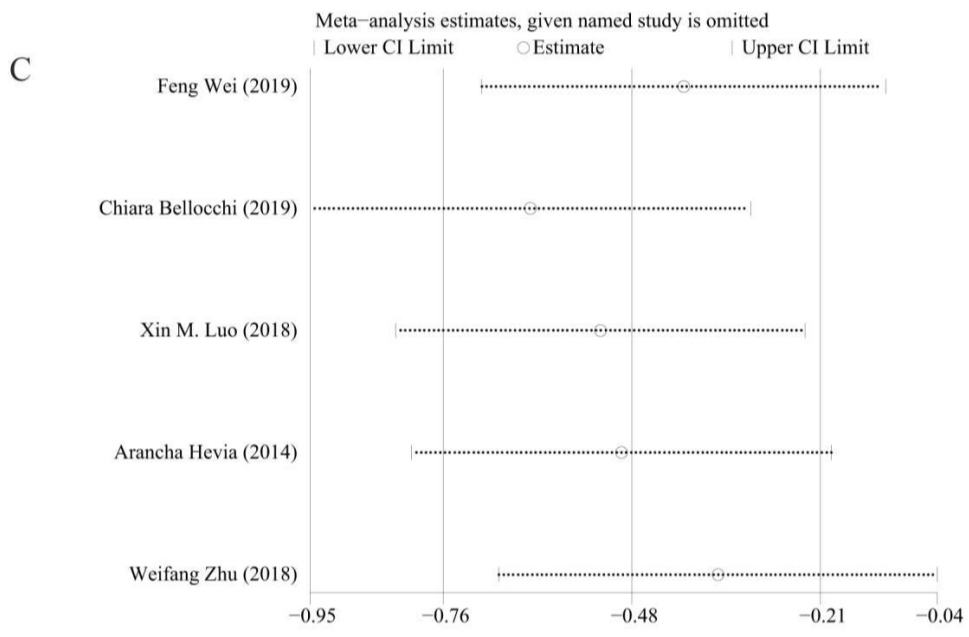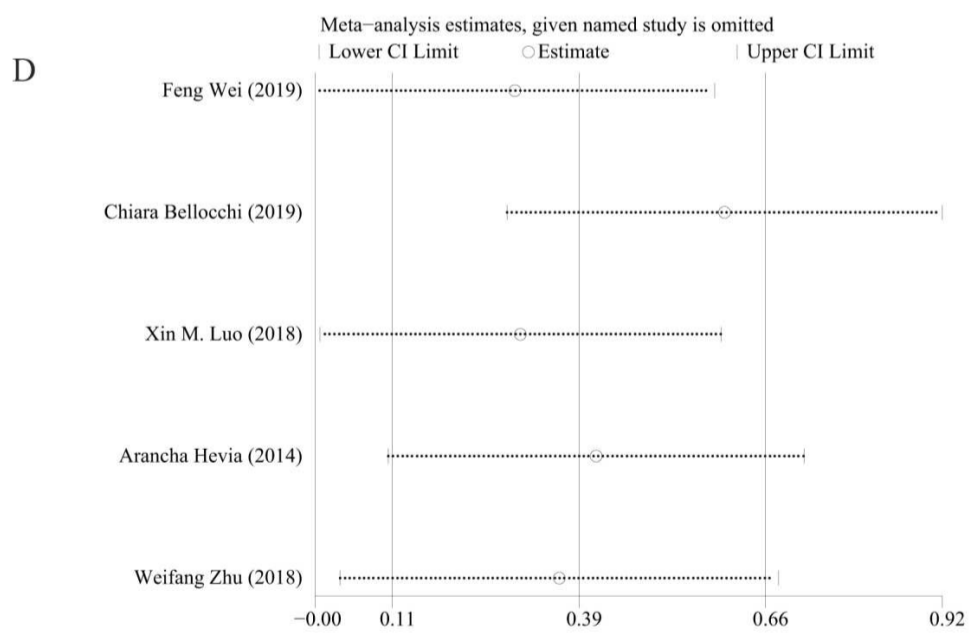

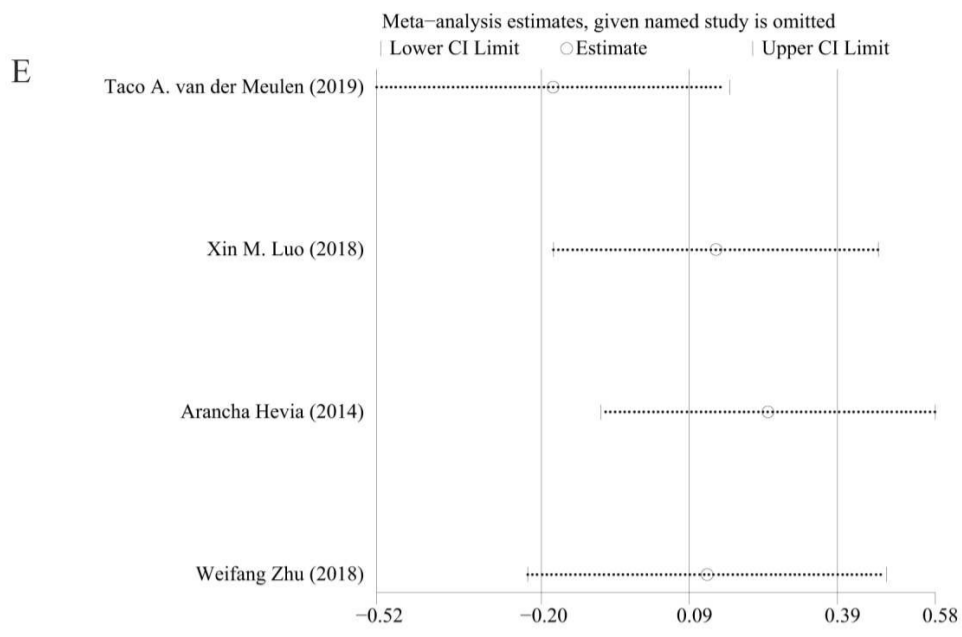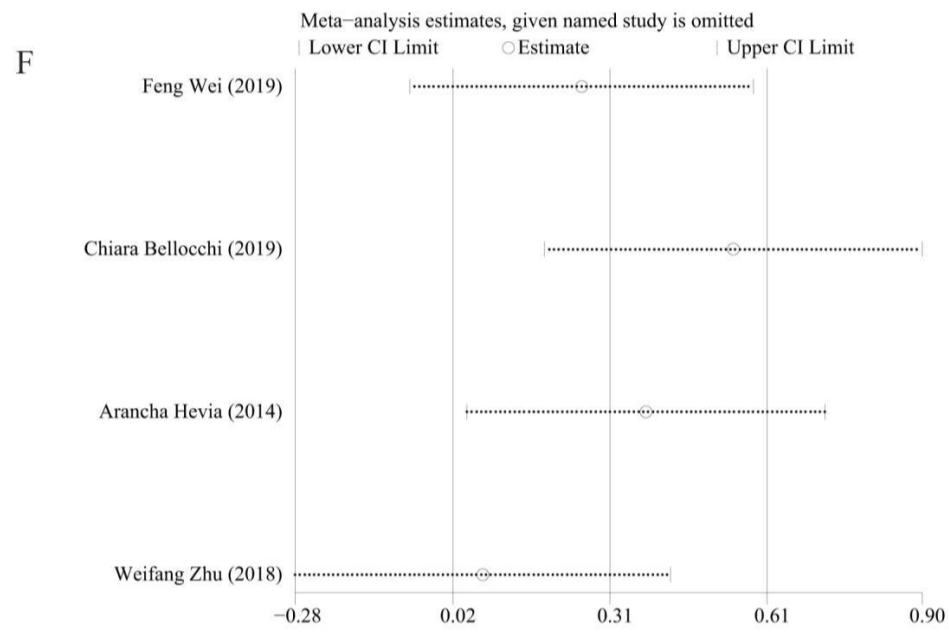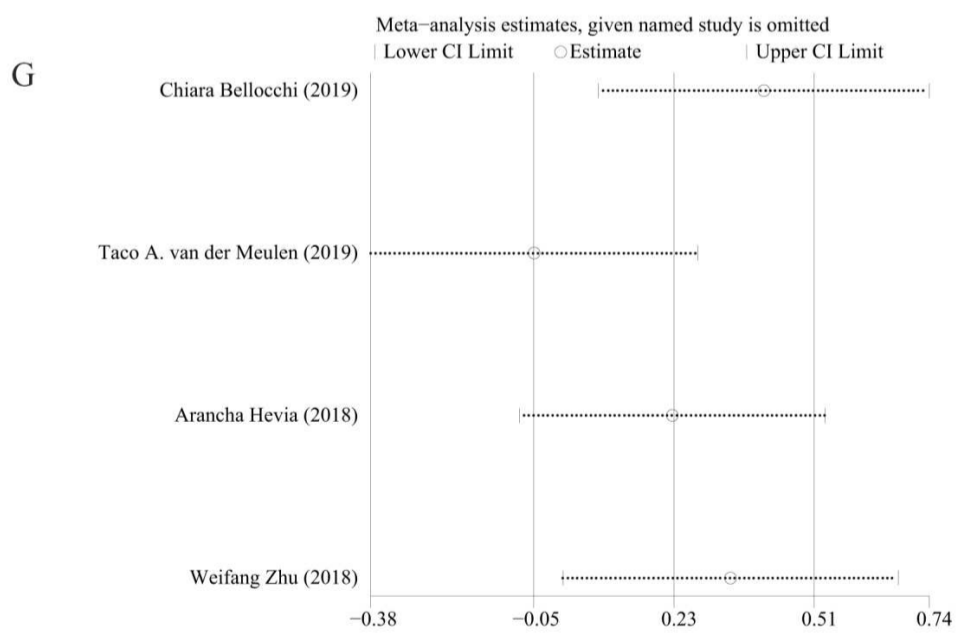

Supplement: lupus-2021-000599supp002.pdf [file lupus-2021-000599supp002.pdf]
